# Supplementary material
Source: ML conference proceedings conference paper supplement (https://www.ecva.net/papers/eccv_2020/papers_ECCV/html/123690239_ECCV_2020_paper.php)
Supplement: Supplementary file 1 [file 123690239-supp.zip]

# Adaptive Mixture Regression Network with Local Counting Map for Crowd Counting

## Supplementary Material

Anonymous ECCV submission

Paper ID 4582

In this supplementary material, we present the intuitive comparison between LCM and density map as shown in Figure. 1. We also provide the quantitative results of our method on four challenging datasets including ShanghaiTech Part A, Part B, UCF-QNRF and UCF-CC-50, as shown in Figure. 2, 3, 4 and 5.. Moreover, the training and testing code is available in the supplementary material. For the limitation of upload file size, we couldn't provide the trained models, but you can use the codes to get the models with the guidance document by yourself.

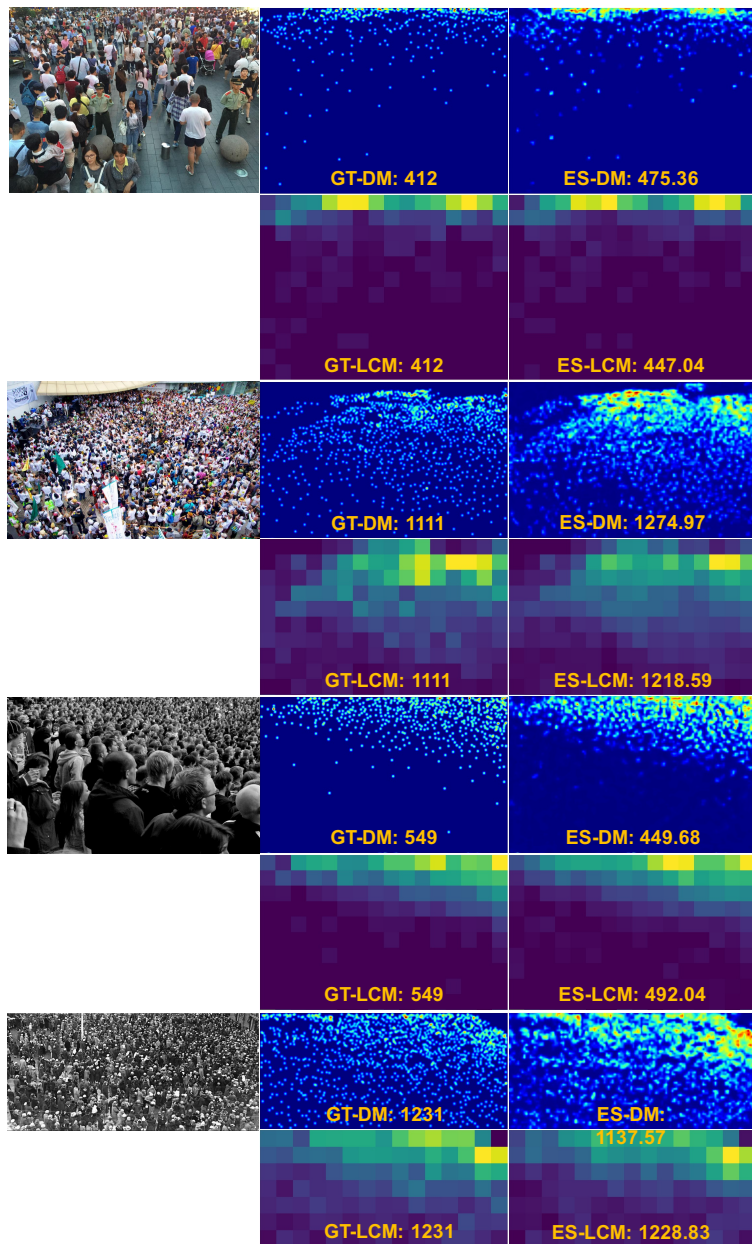

**Fig. 1.** Some qualitative comparisons between the local counting map (LCM) and the density map (DM). (*GT-DM*: ground-truth of DM; *ES-DM*: estimation of DM; *GT-LCM*: ground-truth of LCM; *ES-LCM*: estimation of LCM)

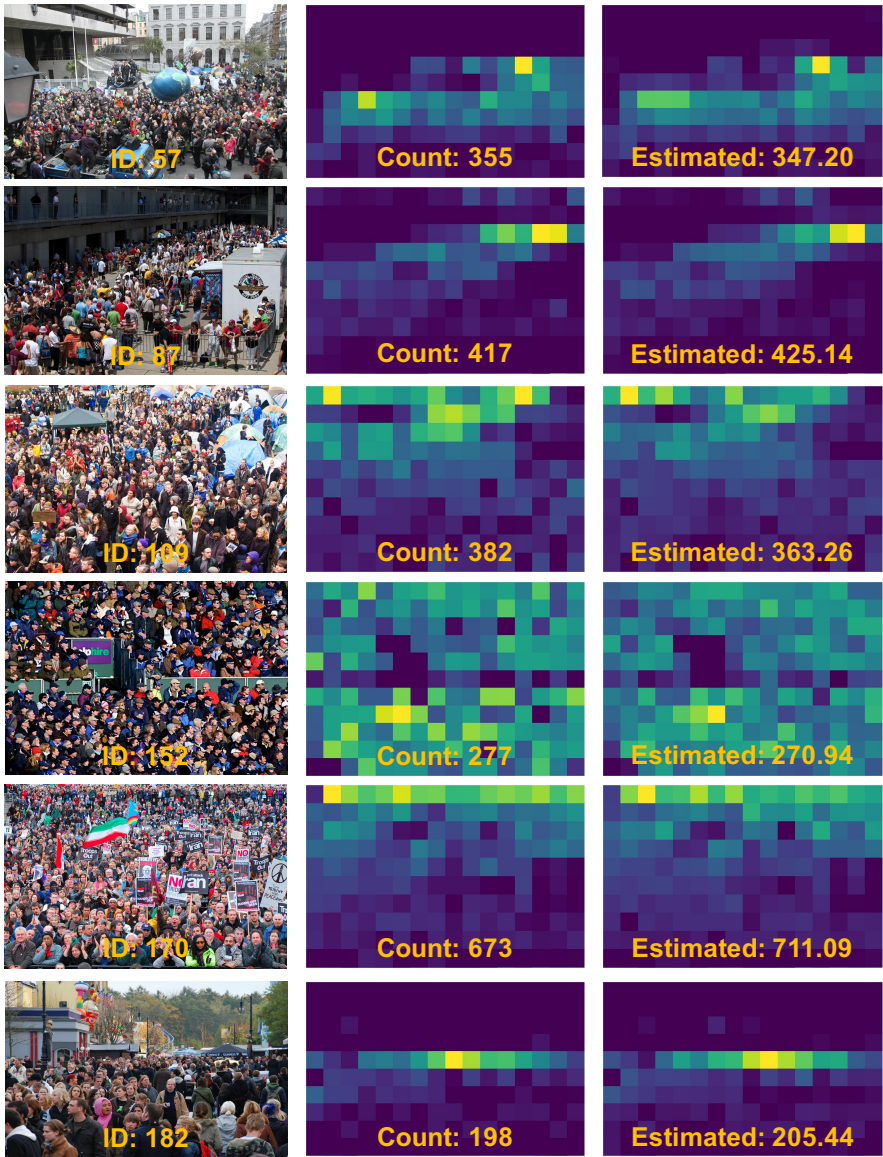

**Fig. 2.** Some samples generated by our approach from the test set of ShanghaiTech Part A dataset. The left column shows the original images, while the middle and right columns display the ground truth and predicted LCM respectively.

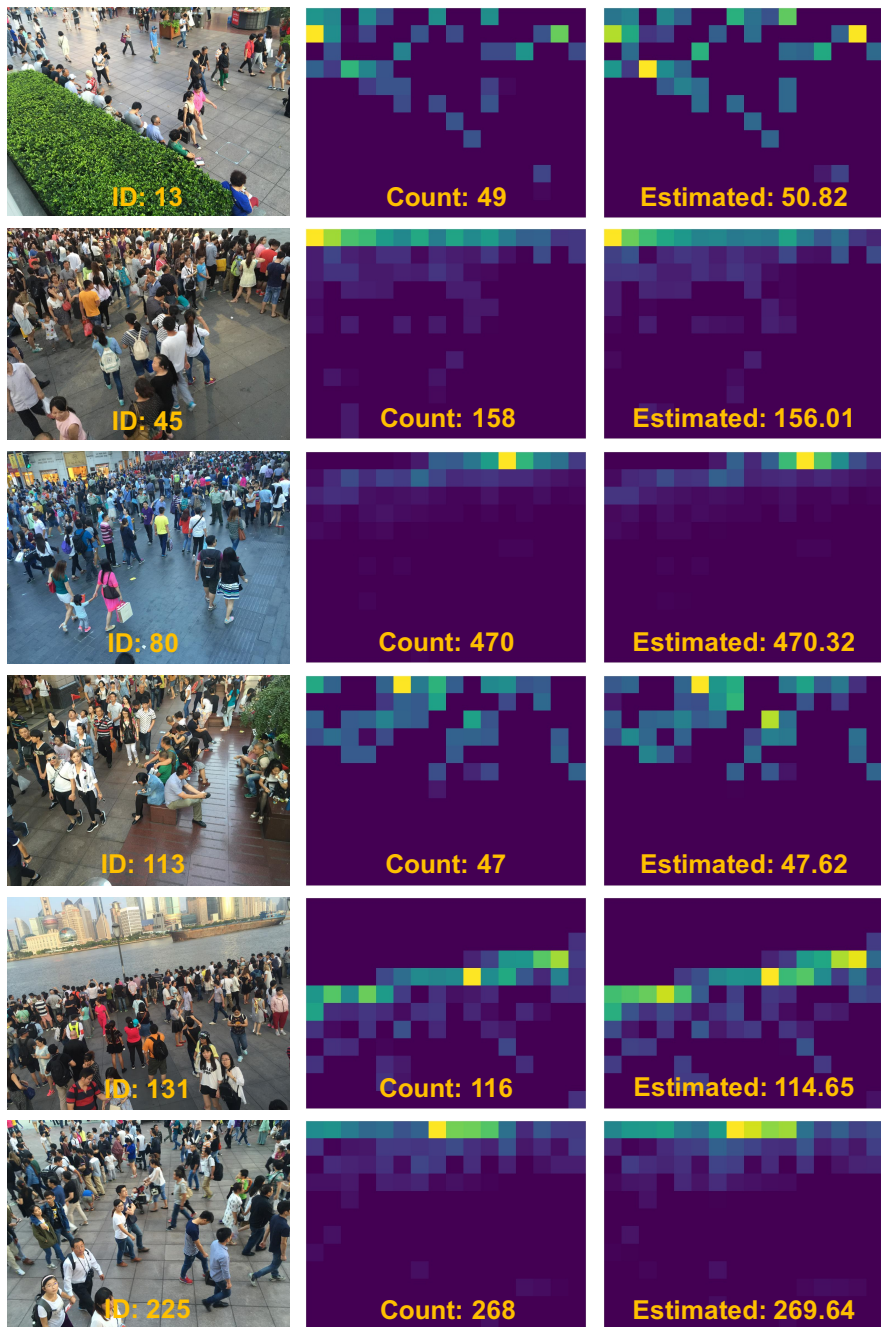

**Fig. 3.** Some samples generated by our approach from the test set of ShanghaiTech Part B dataset. The left column shows the original images, while the middle and right columns display the ground truth and predicted LCM respectively.



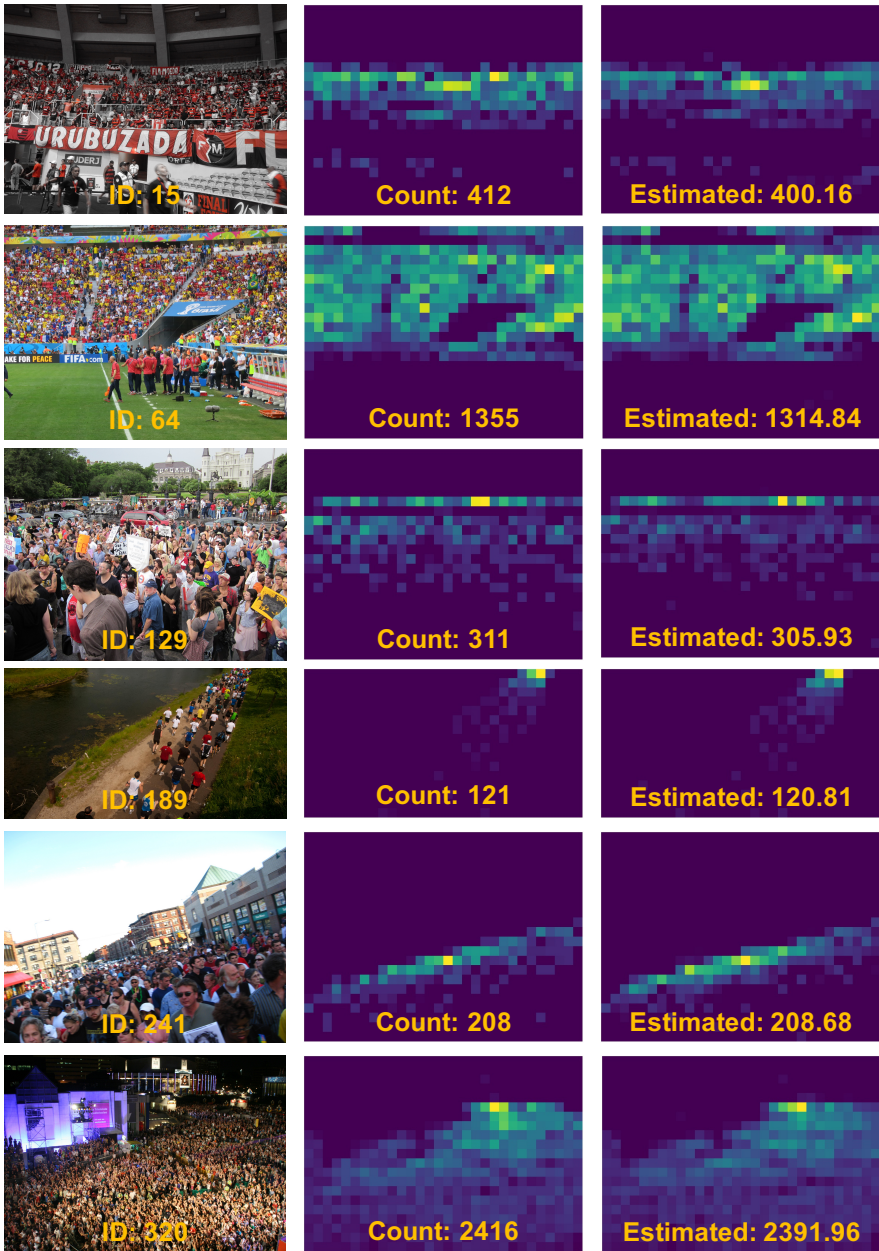

**Fig. 4.** Some samples generated by our approach from the test set of UCF-QNRF dataset. The left column shows the original images, while the middle and right columns display the ground truth and predicted LCM respectively.

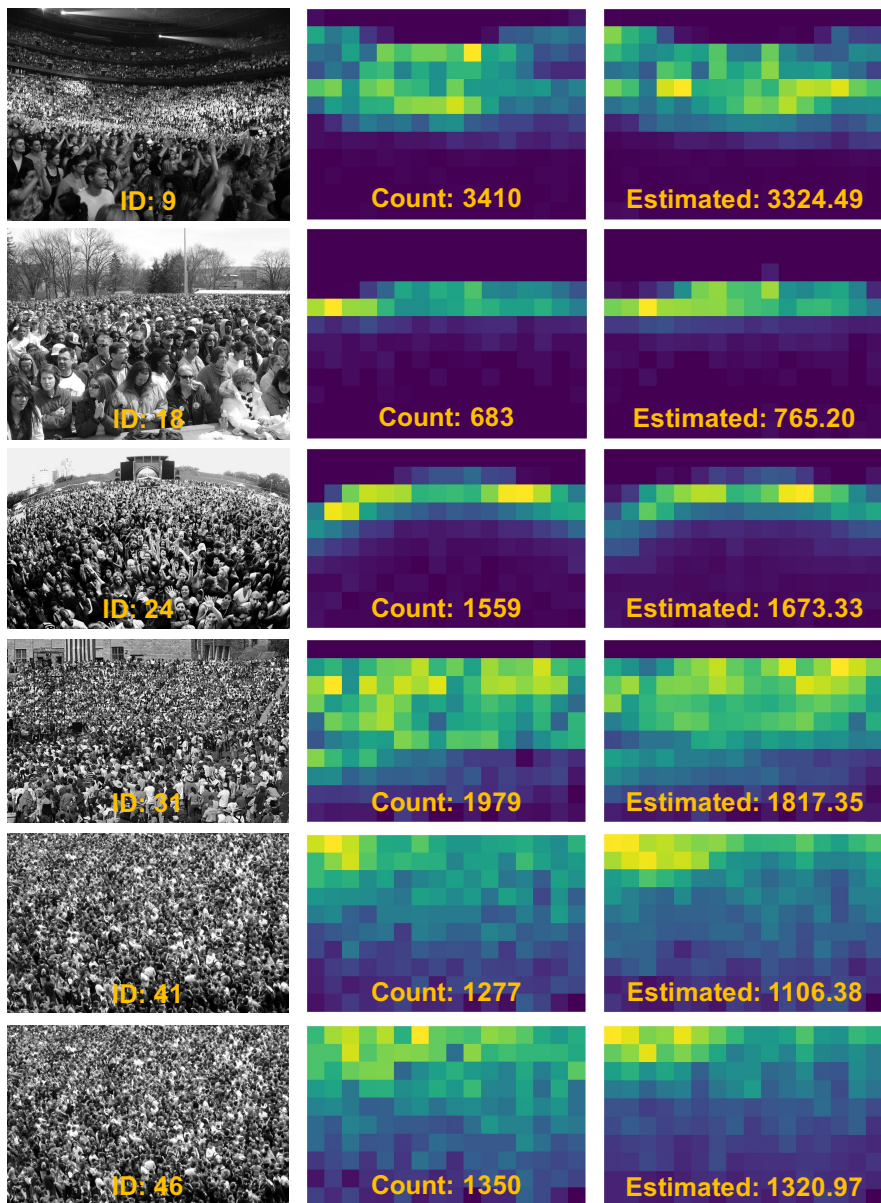

**Fig. 5.** Some samples generated by our approach from the test set of UCF-CC-50 dataset. The left column shows the original images, while the middle and right columns display the ground truth and predicted LCM respectively.
